# Supplementary material
Source: PubMed Central journal article supplement (PMC7223715)
Supplement: 41565_2020_648_MOESM1_ESM.pdf [file 41565_2020_648_MOESM1_ESM.pdf]

In the format provided by the authors and unedited.

# Dual-targeting nanoparticle vaccine elicits a therapeutic antibody response against chronic hepatitis B

Wenjun Wang<sup>1,2</sup>, Xiaoxiao Zhou<sup>1,2</sup>, Yingjie Bian<sup>1</sup>, Shan Wang<sup>3</sup>, Qian Chai<sup>1</sup>, Zhenqian Guo<sup>3</sup>, Zhenni Wang<sup>3</sup>, Ping Zhu<sup>4</sup>, Hua Peng<sup>1</sup>, Xiyun Yan<sup>5</sup>, Wenhui Li<sup>6</sup>, Yang-Xin Fu<sup>7</sup> and Mingzhao Zhu<sup>1,2</sup> ✉

<sup>1</sup>Key Laboratory of Infection and Immunity, Institute of Biophysics, Chinese Academy of Sciences, Beijing, China. <sup>2</sup>College of Life Sciences, University of the Chinese Academy of Sciences, Beijing, China. <sup>3</sup>Department of Pediatric Surgical Oncology, Children's Hospital, Chongqing Medical University, Chongqing, China. <sup>4</sup>National Laboratory of Biomacromolecules, Institute of Biophysics, Chinese Academy of Sciences, Beijing, China. <sup>5</sup>Key Laboratory of Protein and Peptide Pharmaceutical, Institute of Biophysics, Chinese Academy of Sciences, Beijing, China. <sup>6</sup>National Institute of Biological Sciences, Beijing, China. <sup>7</sup>Department of Pathology, University of Texas Southwestern Medical Center, Dallas, TX, USA. ✉e-mail: [zhumz@ibp.ac.cn](mailto:zhumz@ibp.ac.cn)

1 **Dual-targeting nanoparticle vaccine elicits a therapeutic antibody response**  
2 **against chronic hepatitis B**

3

4 Wenjun Wang<sup>1,2</sup>, Xiaoxiao Zhou<sup>1,2</sup>, Yingjie Bian<sup>1</sup>, Shan Wang<sup>3</sup>, Qian Chai<sup>1</sup>, Zhenqian  
5 Guo<sup>3</sup>, Zhenni Wang<sup>3</sup>, Ping Zhu<sup>4</sup>, Hua Peng<sup>1</sup>, Xiyun Yan<sup>5</sup>, Wenhui Li<sup>6</sup>, Yang-Xin Fu<sup>7</sup>  
6 & Mingzhao Zhu<sup>1,2\*</sup>

7

8

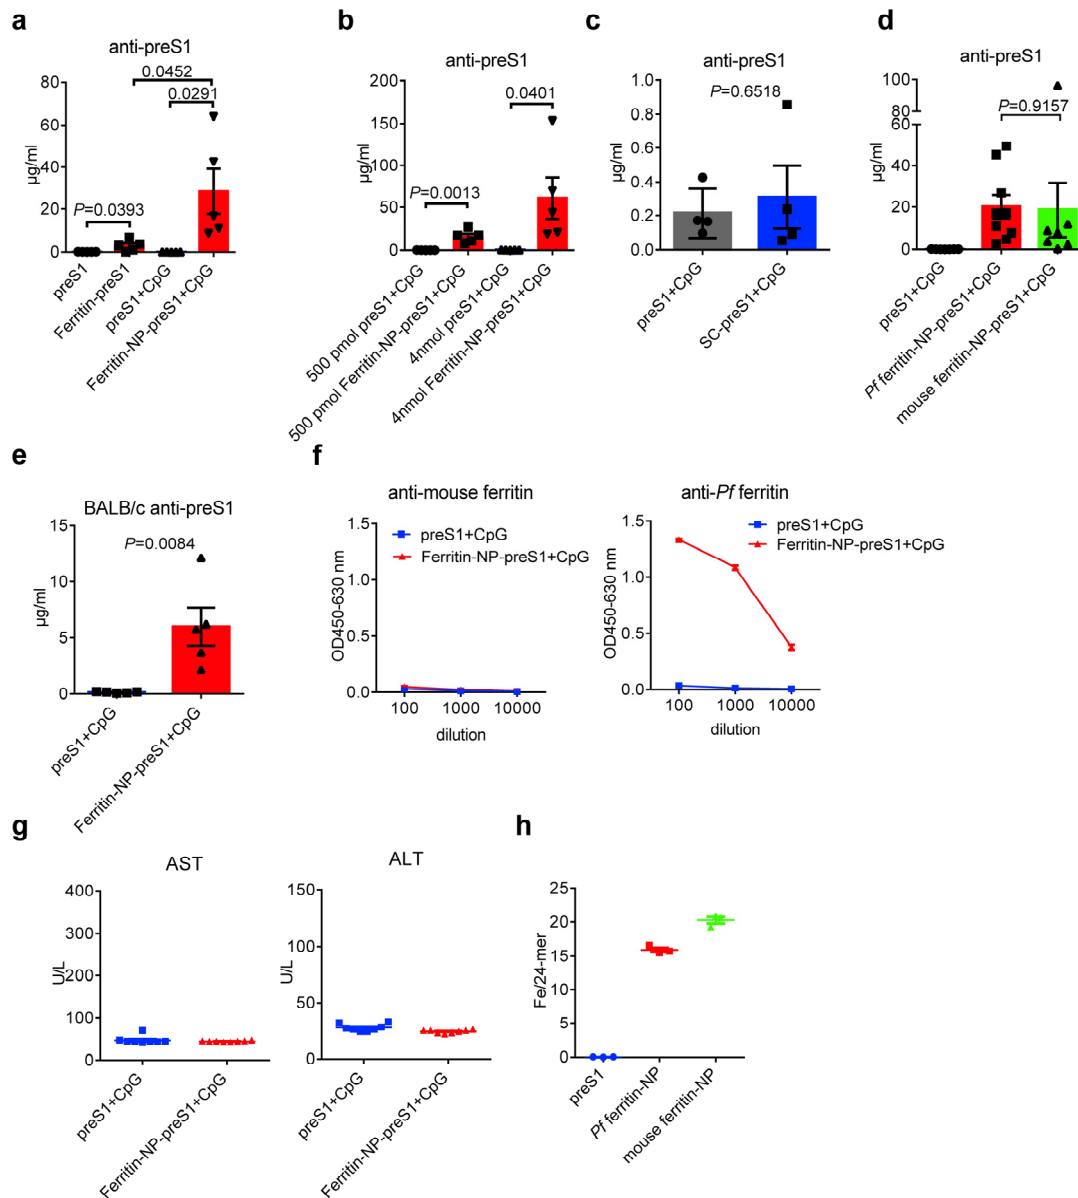

9

# **Supplementary Fig. 1: Ferritin-NP-preS1 vaccine is efficient and bio-safe.**

**a**, Naïve WT C57BL/6 mice (n=5) were subcutaneously immunized with 500 pmol ferritin-NP-preS1 or equimolar SC-preS1 subcutaneously with or without 30 µg CpG-1826 adjuvant at day 0 and 14. Anti-preS1 response was detected at day 21. **b**, Naïve WT C57BL/6 mice (n=5) were subcutaneously immunized with 500 pmol or 4 nmol ferritin-NP-preS1 or equimolar SC-preS1 soluble antigen with 30 µg CpG-1826 adjuvant at day 0 and 14. Anti-preS1 response was detected at day21. **c**, 500 pmol SC-preS1 or preS1 were subcutaneously immunized with 30 µg CpG-1826 adjuvant at day 0 and 14 (n=4). Anti-preS1 response was detected at day21. **d**, Anti-preS1 response at day 21 upon immunization with 500 pmol SC-preS1 (n=7), equimolar *Pf* ferritin-NP-preS1 (n=9) or mouse ferritin-NP-preS1 vaccine (n=7) were detected. **e**, Naïve WT BALB/c mice (n=5) were subcutaneously immunized with 500 pmol ferritin-NP-preS1 or equimolar SC-preS1 soluble antigen with 30 µg CpG-1826 adjuvant at day 0 and 14. Anti-preS1 response was detected at day 21. **f**, Antibody response against *Pf* ferritin and

mouse ferritin in SC-preS1 (n=6) or *Pf* ferritin NP vaccine (n=10) immunized mice at day 21. **g**, ALT and AST in sera collected at day 21 from vaccine immunized mice were measured (n=8). **h**, The iron content in ferritin NP (n=3). **a-f** are representative results of three independent experiments. **g** and **h** are representative results of two independent experiments. Data are shown as mean  $\pm$  SEM. In **a-e**, statistical significance was determined by unpaired two-tailed *t*-test.

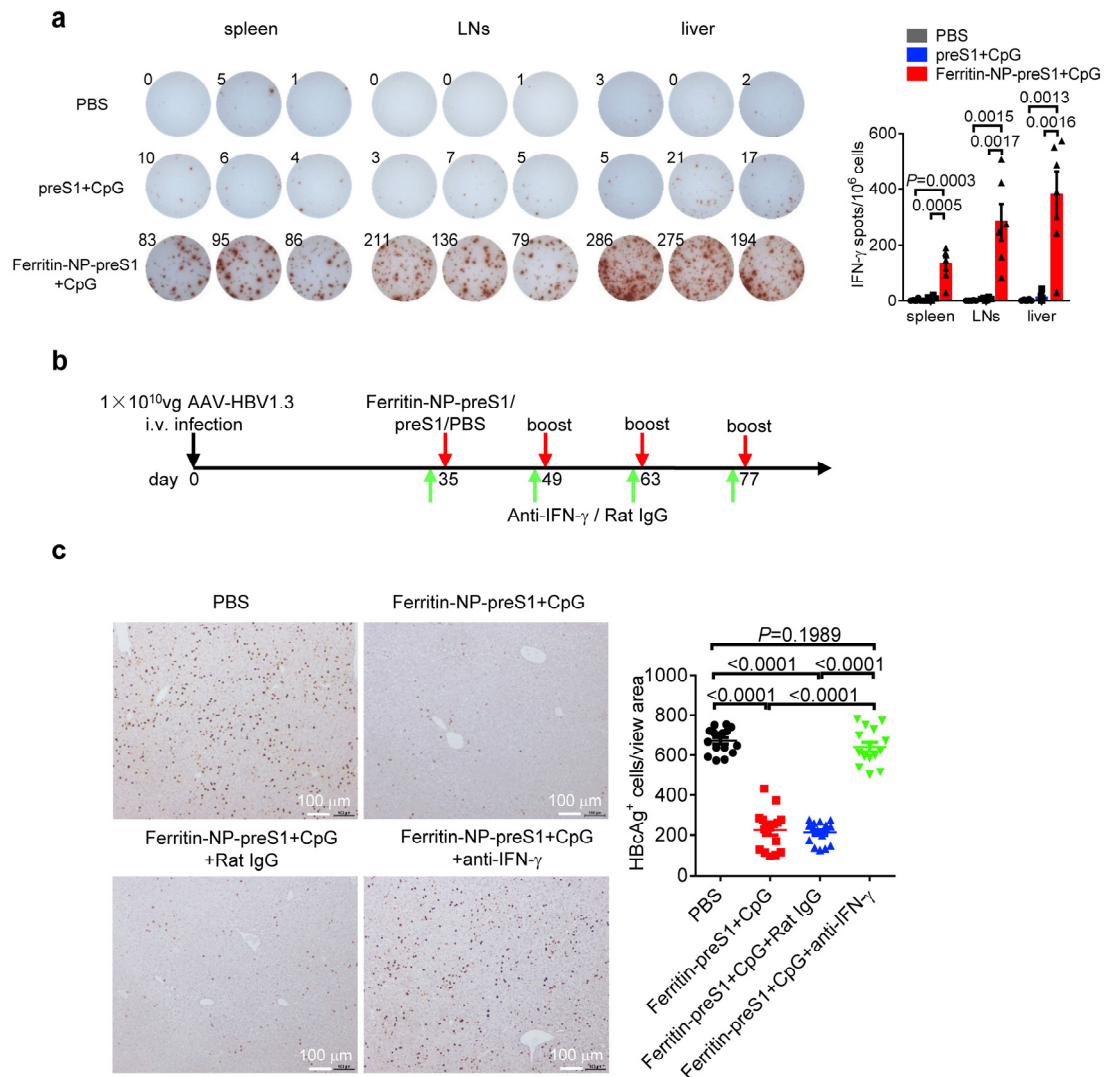

## Supplementary Fig. 2: The therapeutic effect of ferritin-NP-preS1 vaccine depends on IFN-γ.

**a**, Stable HBV carrier mice (n=6) were vaccinated with ferritin-NP-preS1 vaccine or equimolar SC-preS1 soluble antigen regularly as in Fig. 3. Mice were sacrificed on the last day (day147), and 5 × 10<sup>5</sup> lymphocytes from LNs, spleen and liver were collected. Then, cells were stimulated with preS1 polypeptide for 48h. PreS1 specific IFN $\gamma$  secretion was measured by ELISPOT assay. Data are representative results of two independent experiments. **b**, C57BL/6 mice (n=6) were inoculated with 1 × 10<sup>10</sup> vg AAV-HBV1.3 virus intravenously. After 5 weeks, stable HBV carrier mice were vaccinated with 500 pmol ferritin-NP-preS1 vaccine with 30  $\mu$ g CpG-1826 adjuvant for 4 times every 2 weeks as in Fig. 3. The IFN- $\gamma$  blocking antibody (XMG1.2) or Rat IgG was administrated i.p. for 4 times the day before each vaccination. **c**, Immunological histological chemistry (IHC) staining for HBcAg in hepatocytes at day 147. Positive cells were counted by ImageJ software (n=16 section fields). Scale bar, 100  $\mu$ m. Data are representative results of three independent experiments. In **a** and **c**, data are shown as mean  $\pm$  SEM, statistical significance was determined by unpaired two-tailed *t*-test.

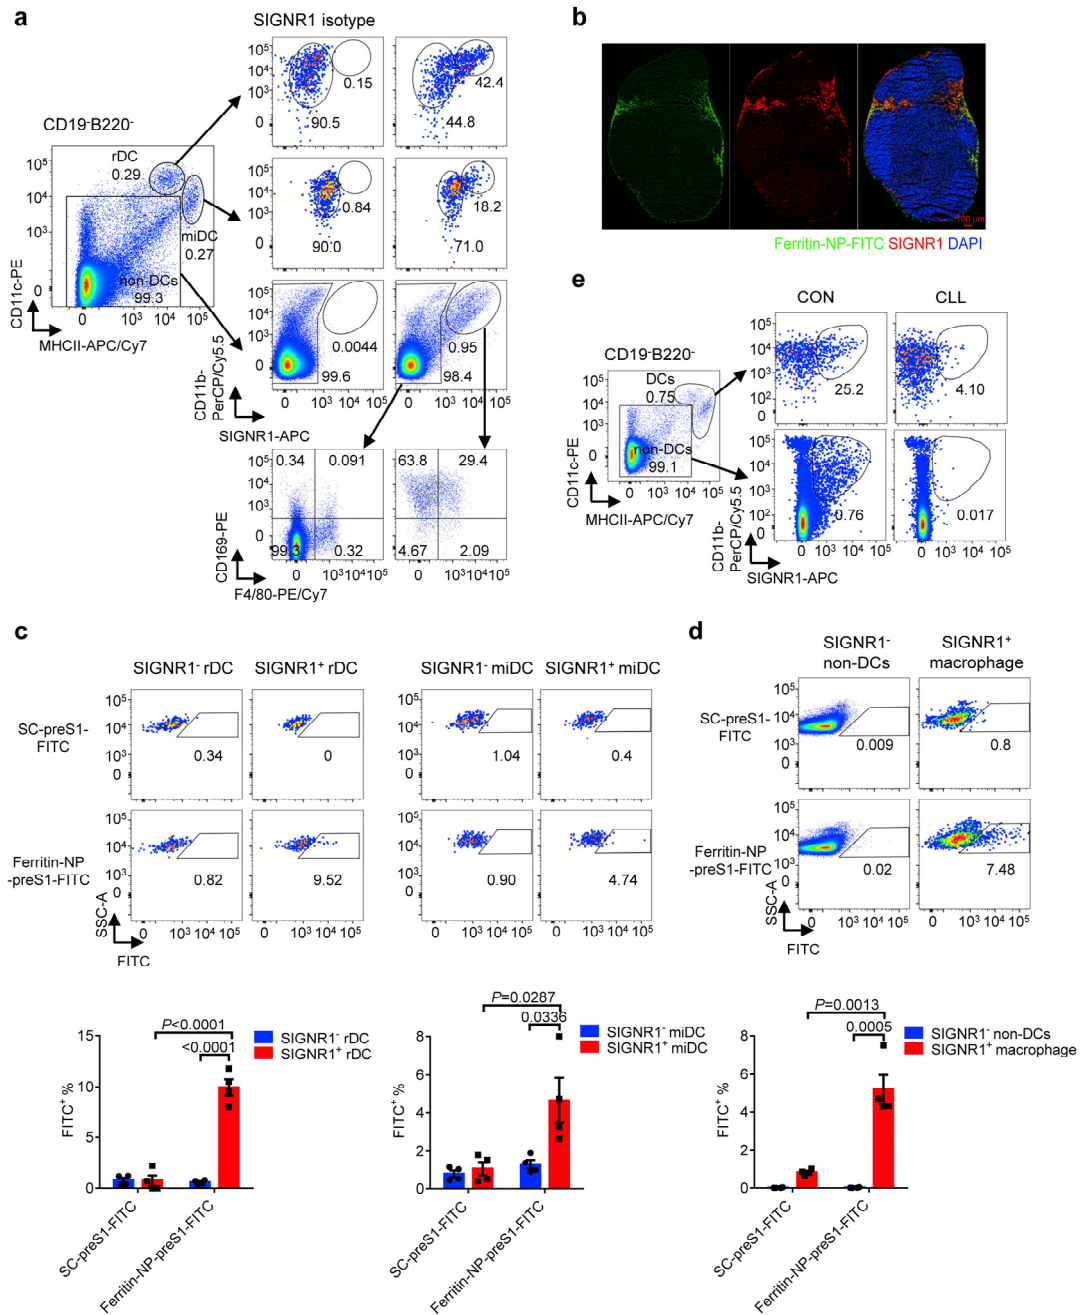

### Supplementary Fig. 3: Ferritin-NP targets SIGNR1<sup>+</sup> APCs.

**a**, Inguinal LNs were digested into single cells, CD19-B220<sup>-</sup> non-B cells were identified into three distinct populations: resident DC (rDC, CD11c<sup>hi</sup>MHCII<sup>+</sup>), migratory DC (miDC, CD11c<sup>+</sup>MHCII<sup>hi</sup>) and non-DC. Surface expression of SIGNR1 and CD11b by these three populations were analyzed. Among the non-DC population, SIGNR1<sup>+</sup> and SIGNR1<sup>-</sup> cells were analyzed by anti-F4/80 and anti-CD169 further. Numbers adjacent to the outlined areas indicate percent of each gate. The data show representative results of at least three independent experiments. **b**, C57BL/6 mice were subcutaneously injected with 2 nmol ferritin-NP-preS1-FITC. 4h after injection, cryo-sections of inguinal LNs were obtained. The section was stained with anti-SIGNR1 (red) and DAPI (blue). The data are representative results of three independent experiments. **c,d**,

60 C57BL/6 mice (n=4) were subcutaneously injected with 2 nmol ferritin-NP-preS1-  
61 FITC or equimolar SC-preS1-FITC. 4h after injection, ferritin-NP-preS1-FITC or SC-  
62 preS1-FITC capture of indicated DCs (**c**) or non-DCs (**d**) in iLN were presented and  
63 statistically analyzed. **c** and **d** are representative results of two independent experiments.  
64 Data are shown as mean  $\pm$  SEM, statistical significance was determined by unpaired  
65 two-tailed *t*-test. **e**, 10 days post clodronate liposome (CLL) or control liposome (CON)  
66 f.p. injection, depletion of SIGNR1<sup>+</sup> cells in pLN was determined by flow cytometry.  
67 The data are representative results of three independent experiments.

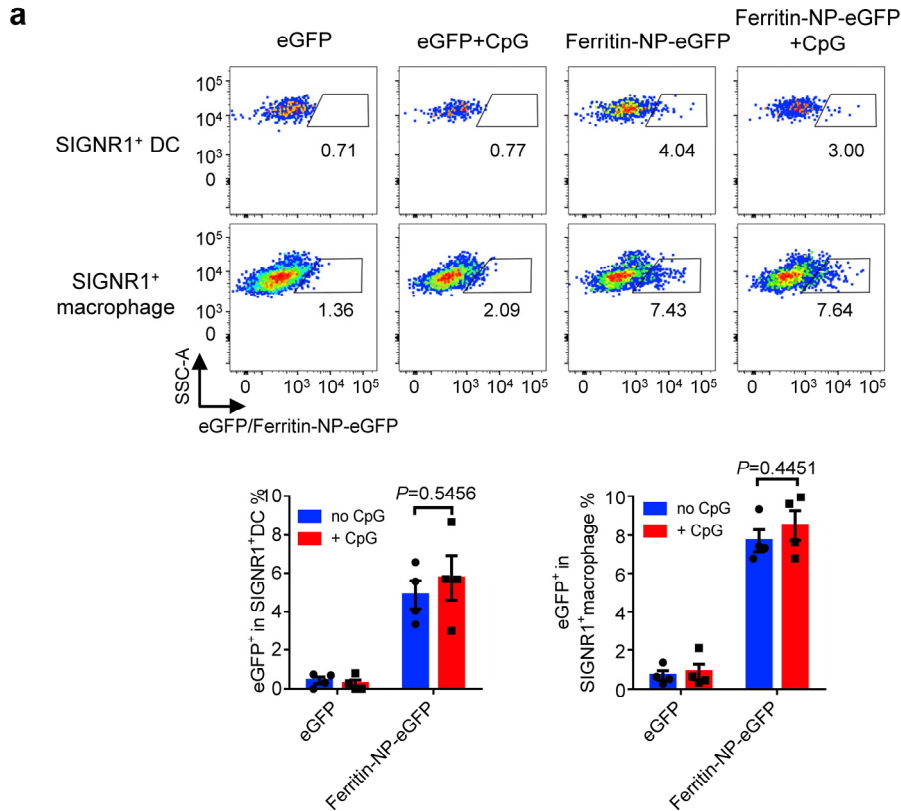

**Supplementary Fig. 4: CpG-1826 adjuvant has no effect on ferritin-NP capture.**  
**a**, C57BL/6 mice (n=4) were subcutaneously injected with 2 nmol ferritin-NP-eGFP or equimolar eGFP-SpyTag with or without 30 $\mu$ g CpG-1826 adjuvant. 4h after injection, inguinal LNs were digested into single cells, ferritin-NP-eGFP or eGFP-SpyTag capture by SIGNR1<sup>+</sup> DCs and SIGNR1<sup>+</sup> macrophages were presented and statistically analyzed. Data are representative results of two independent experiments. Data are shown as mean  $\pm$  SEM, statistical significance was determined by unpaired two-tailed *t*-test.

**a**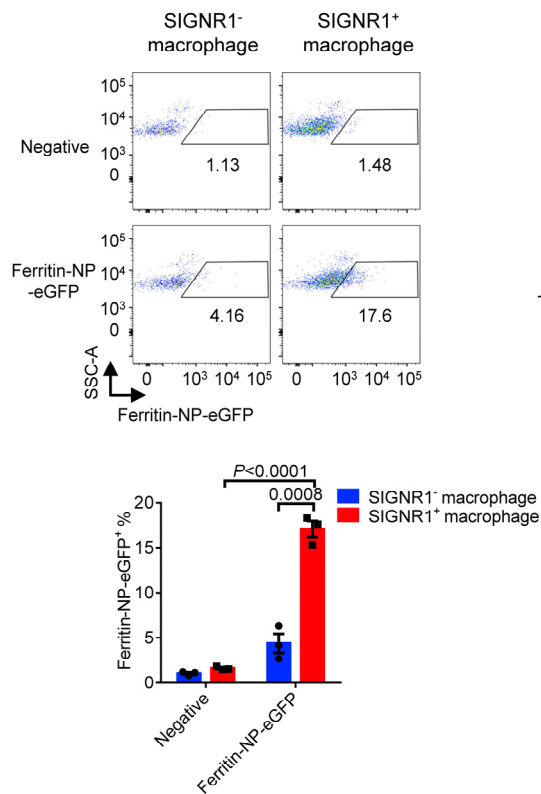**b**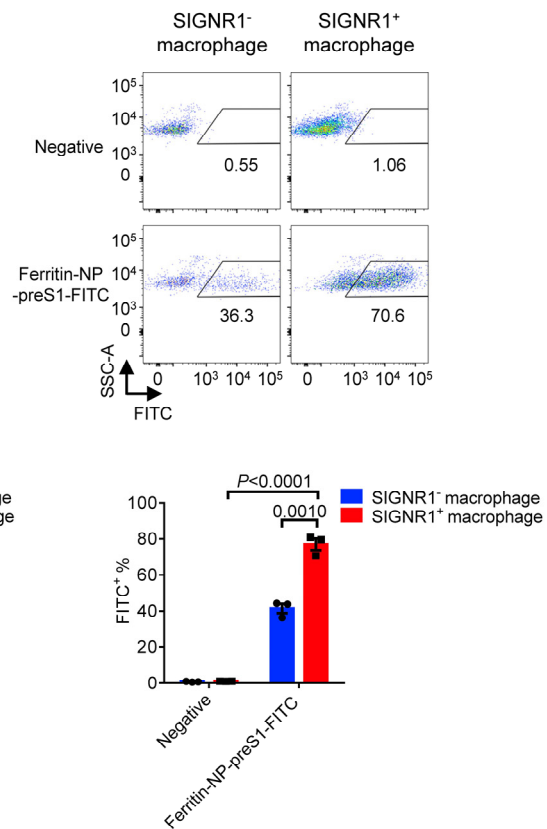

77

78 **Supplementary Fig. 5: Ferritin-NP targets SIGNR1<sup>+</sup> APCs *in vitro*.**

79 **a,b**, Inguinal LNs from C57BL/6 WT mice were digested into single cells and incubated  
 80 with ferritin-NP-eGFP (**a**) or ferritin-NP-preS1-FITC (**b**) *in vitro* (n=3). Ferritin-NP  
 81 capture by CD11c<sup>-</sup>CD11b<sup>+</sup>SIGNR1<sup>-</sup> macrophages or CD11c<sup>-</sup>CD11b<sup>+</sup>SIGNR1<sup>+</sup>  
 82 macrophages were presented and statistically analyzed. Data are representative results  
 83 of three independent experiments. Data are shown as mean  $\pm$  SEM, statistical  
 84 significance was determined by unpaired two-tailed *t*-test.

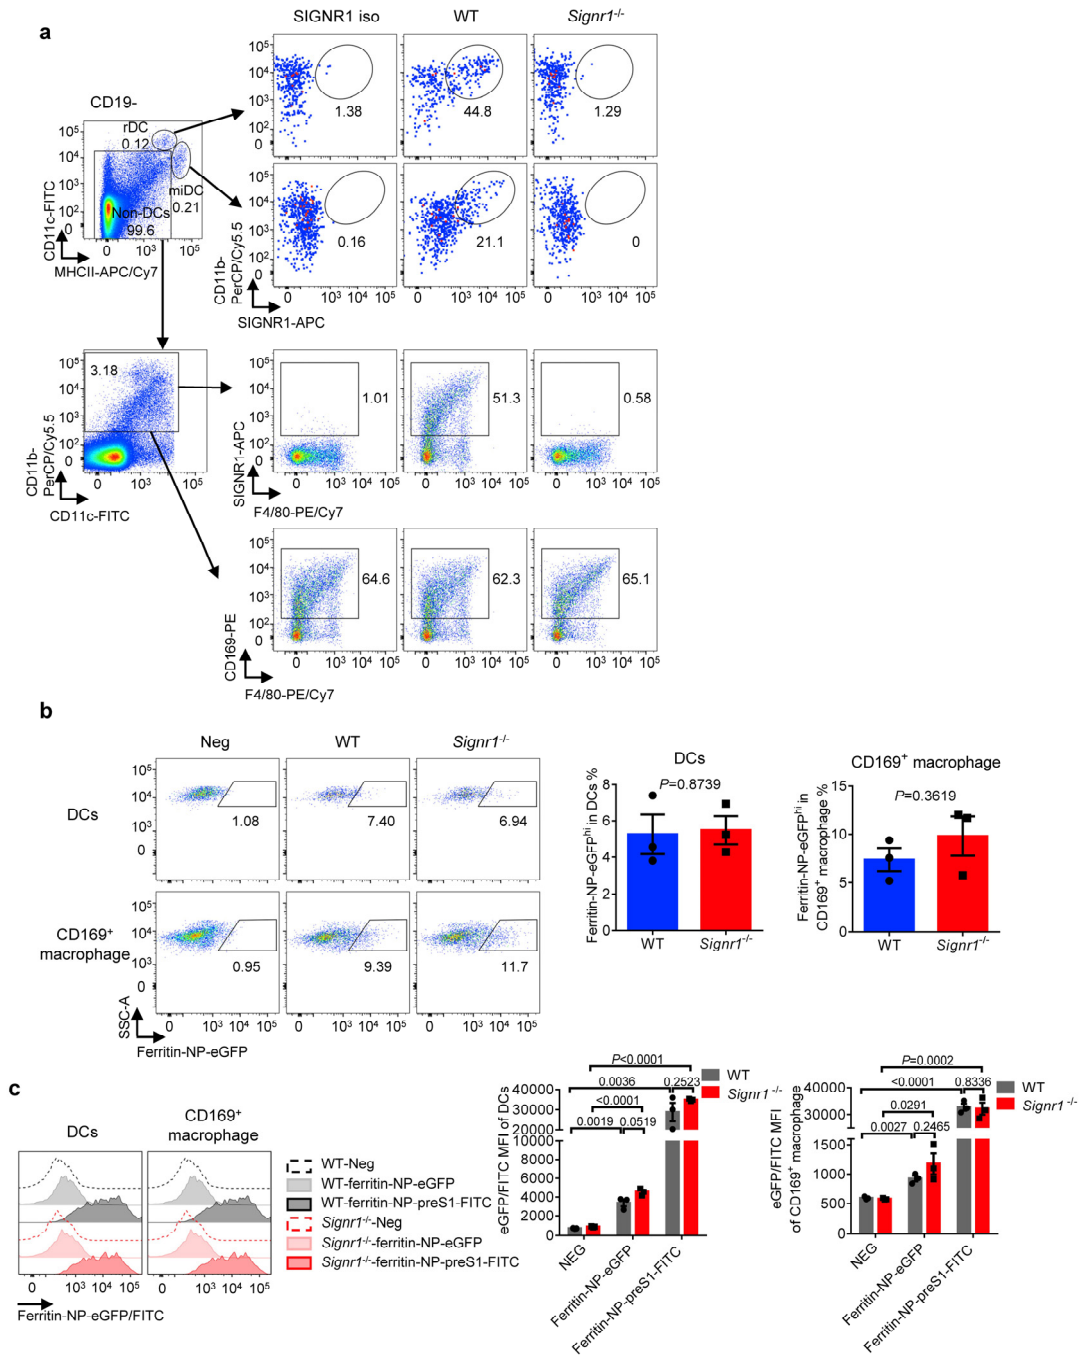

## Supplementary Fig. 6: Ferritin-NP targeting in *Signr1*<sup>-/-</sup> mice.

**a**, Inguinal LNs from WT or *Signr1*<sup>-/-</sup> mice were digested into single cells, CD19<sup>-</sup> non-B cells were identified into rDC, miDC and non-DCs. The percentages of SIGNR1<sup>+</sup> rDC, SIGNR1<sup>+</sup> miDC, SIGNR1<sup>+</sup> macrophages and CD169<sup>+</sup> macrophages were analyzed as indication. Data are representative results of three independent experiments.

**b**, WT or *Signr1*<sup>-/-</sup> mice (n=3) were subcutaneously injected with 2 nmol ferritin-NP-eGFP. 4h after injection, inguinal LNs were digested into single cells, ferritin-NP-eGFP capture by DCs and CD169<sup>+</sup> macrophages were presented and statistically analyzed.

**c**, Inguinal LNs from WT or *Signr1*<sup>-/-</sup> mice were digested into single cells and incubated with ferritin-NP-eGFP or ferritin-NP-preS1-FITC *in vitro* (n=3). Ferritin-NP capture by

96 DCs and CD169<sup>+</sup> macrophages were presented and statistically analyzed. In **b** and **c**,  
97 data are representative results of two independent experiments, Data are shown as mean  
98  $\pm$  SEM, statistical significance was determined by unpaired two-tailed *t*-test.  
99

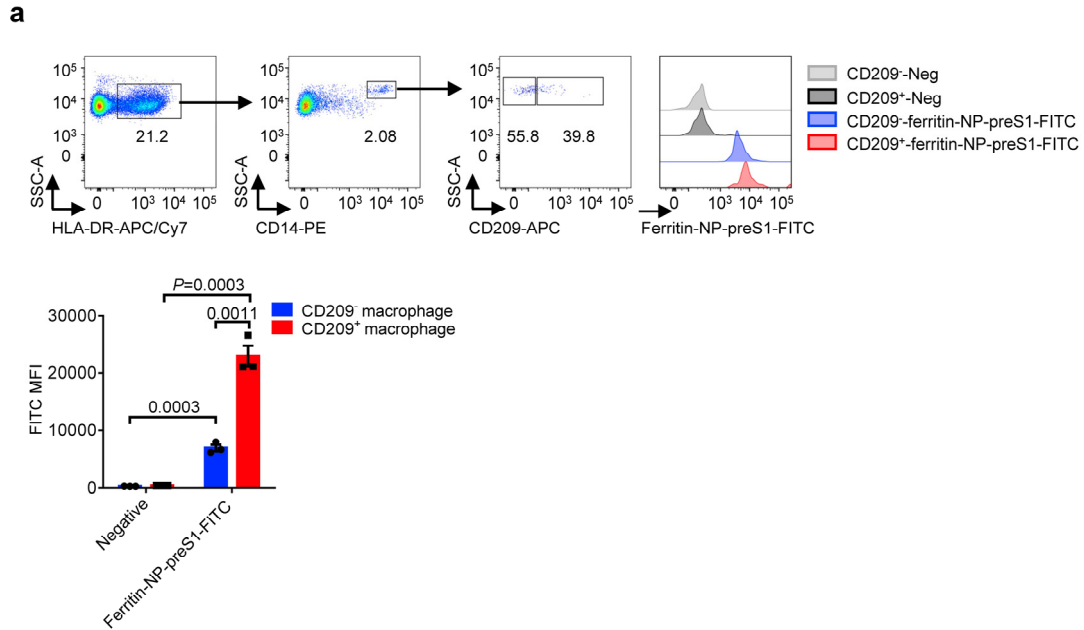

**Supplementary Fig. 7: Ferritin-NP targets CD209<sup>+</sup> macrophages of human LNs.**

**a**, Human LNs were digested into single cells and incubated with ferritin-NP-preS1-FITC *in vitro* (n=3). HLA-DR<sup>+</sup> CD14<sup>+</sup> macrophages were gated and identified into CD209<sup>+</sup> and CD209<sup>-</sup> populations. The capture of ferritin-NP-FITC by CD209<sup>+</sup> or CD209<sup>-</sup> macrophage was detected and analyzed. Data are representative results of three independent experiments. Data are shown as mean  $\pm$  SEM, statistical significance was determined by unpaired two-tailed *t*-test.

**a**

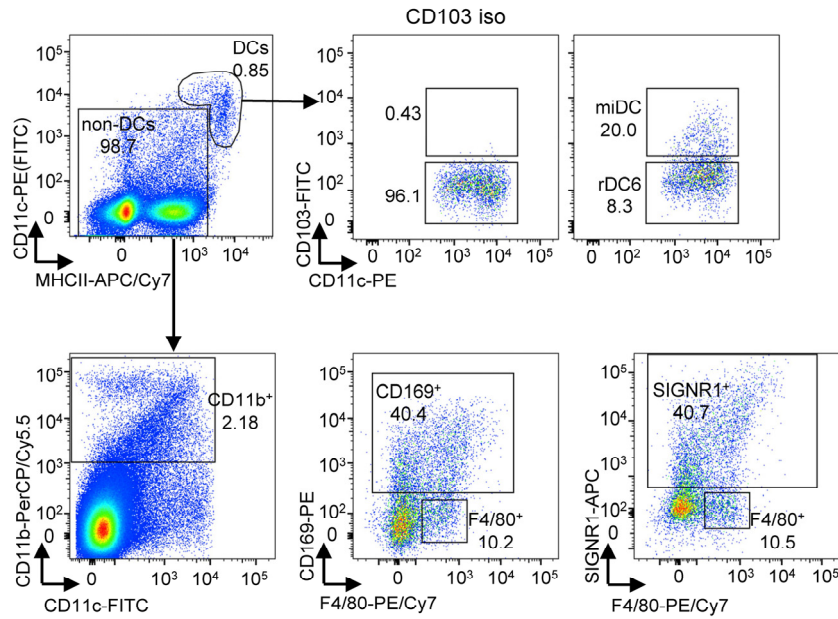

**Supplementary Fig. 8: Gating strategy of antigen presenting cells in LNs after immunization.**

**a**, The gating strategy of antigen presenting cells in dLNs of ferritin-NP vaccine immunized mice. CD11c<sup>+/hi</sup>MHCII<sup>+/hi</sup> DCs were gated firstly and further analyzed by anti-CD103. CD103<sup>+</sup> migratory DCs and CD103<sup>-</sup> resident DCs were gated according to CD103 isotype. CD11b<sup>+</sup> non-DC cells were further classified into F4/80<sup>+</sup> macrophages and CD169<sup>+</sup> or SIGNR1<sup>+</sup> macrophages. Data are representative results of at least three independent experiments.

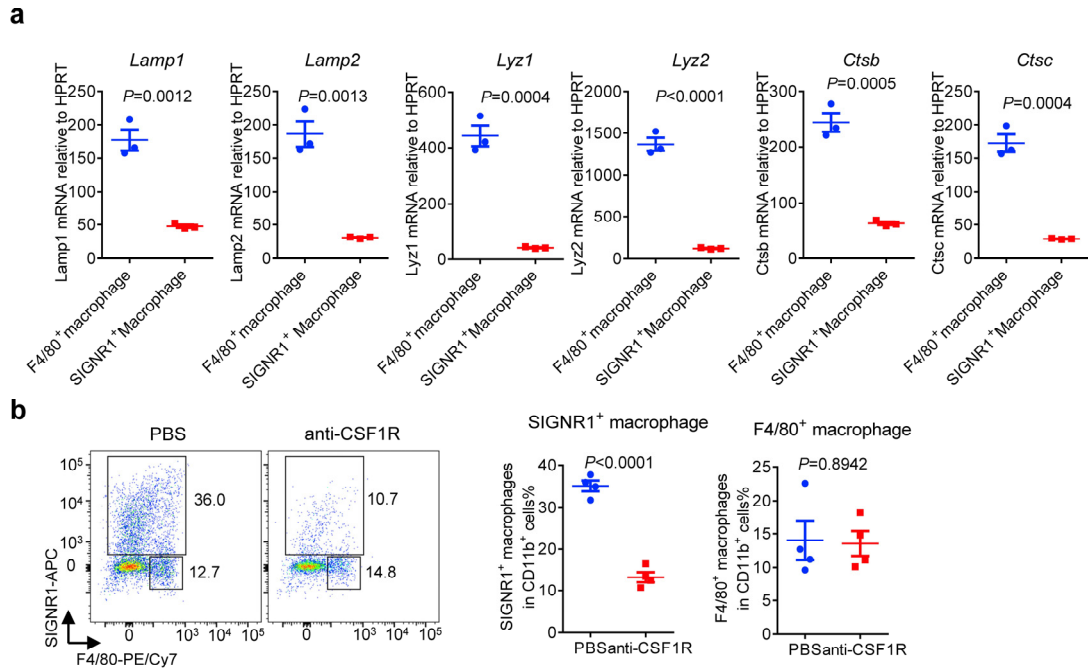

**Supplementary Fig. 9: The characterization and depletion of SIGNR1+ macrophages in dLNs.**

**a**, F4/80<sup>+</sup> macrophages and SIGNR1<sup>+</sup> macrophages were sorted from LNs of naïve mice, the gene expression of lysosome-associated membrane proteins (*Lamp1/Lamp2*), lysozyme (*Lyz1/Lyz2*) and lysosomal proteases (*Ctsb/Ctsc*) were detected by real-time PCR analysis (n=3). The data are representative results of two independent experiments.

**b**, Depletion of SIGNR1<sup>+</sup> macrophages but not F4/80<sup>+</sup> macrophages upon anti-CSF1R treatment was determined by flow cytometry (n=4). Data are representative results of three independent experiments. Data are shown as mean  $\pm$  SEM, statistical significance was determined by unpaired two-tailed *t*-test.

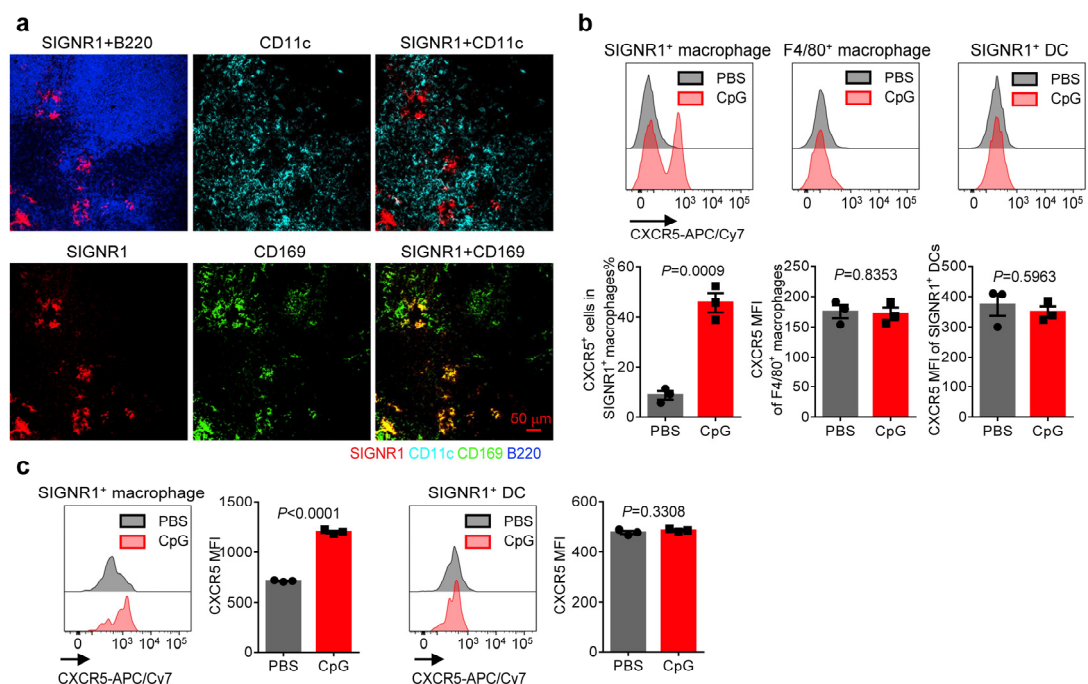

# **Supplementary Fig. 10: SIGNR1<sup>+</sup> macrophages upregulate CXCR5 after CpG immunization for follicular migration.**

**a**, Naïve WT mice were subcutaneously immunized with 30  $\mu$ g CpG-1826. Distribution of SIGNR1<sup>+</sup> (red), CD11c<sup>+</sup> (Cyan), CD169<sup>+</sup> (green) cells and B220<sup>+</sup> (blue) cells in iLNs were determined by immunofluorescence microscopy 3 days later. Data are representative results of three independent experiments. **b**, Naïve WT mice (n=3) were subcutaneously immunized with CpG-1826 adjuvant or PBS. The expression of CXCR5 by SIGNR1<sup>+</sup> macrophage, SIGNR1<sup>+</sup>F4/80<sup>+</sup> macrophage, SIGNR1<sup>+</sup> DC in iLN were analyzed by flow cytometry 3 days later. Data are representative results of four independent experiments. **c**, SIGNR1<sup>+</sup> macrophages and SIGNR1<sup>+</sup> DCs were sorted from naïve WT mice LNs, cells were stimulated with 30  $\mu$ g/ml CpG-1826 for 24 h *in vitro* (n=3), the expression of CXCR5 were analyzed. Data are representative results of three independent experiments. In **b** and **c**, data are shown as mean  $\pm$  SEM, statistical significance was determined by unpaired two-tailed *t*-test.
